1 **Dehydration alters transcript levels in the mosquito midgut, likely facilitating rapid**  
2 **rehydration**

3

4 Christopher J. Holmes<sup>1,\*</sup>, Elliott S. Brown<sup>1</sup>, Dhriti Sharma<sup>1</sup>, Matthew Warden<sup>1</sup>, Atit Pathak<sup>1</sup>,  
5 Blaine Payton<sup>1</sup>, Quynh Nguyen<sup>1</sup>, Austin Spangler<sup>1</sup>, Jaishna Sivakumar<sup>1</sup>, Jacob M. Hendershot<sup>1</sup>,  
6 and Joshua B. Benoit<sup>1</sup>

7

8 <sup>1</sup>Department of Biological Sciences, University of Cincinnati, Cincinnati, OH

9

10 \* Author for correspondence

11 Christopher J. Holmes

12 Department of Biological Sciences,

13 University of Cincinnati, Cincinnati, OH

14 Email: [holmescp@mail.uc.edu](mailto:holmescp@mail.uc.edu)

15 **Abstract**

16 The mosquito midgut is an important site for bloodmeal regulation while also acting as a primary  
17 site for pathogen exposure within the mosquito. Recent studies show that exposure to  
18 dehydrating conditions alters mosquito bloodfeeding behaviors as well as post-feeding  
19 regulation, likely altering how pathogens interact with the mosquito. Unfortunately, few studies  
20 have explored the underlying dynamics between dehydration and bloodmeal utilization, and the  
21 overall impact on disease transmission dynamics remains veiled. In this study, we find that  
22 dehydration-based feeding in the yellow fever mosquito, *Aedes aegypti*, prompts alterations to  
23 midgut gene expression, as well as subsequent physiological factors involving water control and  
24 post-bloodfeeding (pbf) regulation. Altered expression of ion transporter genes in the midgut of  
25 dehydrated mosquitoes and rapid reequilibration of hemolymph osmolality after a bloodmeal  
26 indicate an ability to expedite fluid and ion processing. These alterations ultimately indicate that  
27 female *A. aegypti* employ mechanisms to ameliorate the detriments of dehydration by imbibing  
28 a bloodmeal, providing an effective avenue for rehydration. Continued research into bloodmeal  
29 utilization and the resulting effects on arthropod-borne transmission dynamics becomes  
30 increasingly important as drought prevalence is increased by climate change.

31

32 **Keywords:** *Aedes aegypti*, bloodfeeding, ecdysteroid kinase, ion transport, osmolality,  
33 transcriptomics

## 34 **Introduction**

35 Numerous studies over the last century have investigated the relationships between mosquitoes  
36 and relative humidity [1–15]. However, only a subset of those studies has investigated the  
37 physiological effects of low relative humidity on mosquito biology, with an even smaller subset  
38 controlling for and directly studying the impacts of relative humidity on mosquitoes. This  
39 disparity warrants further exploration, especially considering that weather conditions are a direct  
40 cause of dehydration in mosquitoes, and that incorporation of weather conditions into models  
41 may account for up to 80% of the weekly variation in mosquito infection [1,16].

42         Recent studies implicate dehydration stress in water and nutrient depletion, as well as in  
43 the compensatory mechanisms (e.g., increased bloodmeal retention) required to offset those  
44 detriments [1,7,17]. Unfortunately, these identified mechanisms have been predicted to alter  
45 disease propagation dynamics both within the vector and through host-vector interactions [1,7].  
46 For example, previous findings indicate that nutrient reserves in the northern house mosquito,  
47 *Culex pipiens*, decreased as dehydration exposure increased, resulting in reductions to  
48 mosquito survival and reproduction [8]. Conversely, fortified nutritional reserves have been  
49 shown to improve longevity and increase resistance to pathogen challenge [18]; but direct  
50 connections between dehydration and disease transmission dynamics remains unexplored. It is  
51 therefore paramount to understand the specifics on how humidity drives alterations in mosquito  
52 physiology as well as the biological components and underlying compensatory mechanisms  
53 required to offset any related detriments.

54         Compensatory behaviors are well documented within mosquitoes, with an early study on  
55 *Anopheles* species showing that blood digestion increased during the hot season [15] and later  
56 studies demonstrating that a bloodmeal could be utilized for nutritional supplementation [19,20].  
57 Hagan et al. (2018) began investigating the potential for compensatory mechanisms in

58 dehydrated mosquitoes, finding that biting propensity and carbohydrate metabolism was altered  
59 in dehydrated *C. pipiens*, culminating in a predicted increase to West Nile virus (WNV)  
60 transmission [1]. Holmes et al. (2022) continued this line of research, finding in a recent study  
61 with *C. pipiens* and *A. aegypti* that dehydration prompted increases in bloodfeeding propensity  
62 and greater water content retention from a bloodmeal, resulting in improved survival for  
63 bloodfed mosquitoes in dehydrating conditions [7]. These responses to dehydration were  
64 predicted to increase compensatory bloodfeeding as a response to lost water, ultimately altering  
65 the vectorial capacity of both *C. pipiens* and *A. aegypti* [7].

66         When incorporated into disease models, transmission has been found to be strongly  
67 influenced, and predicted, by factors such as environmental stressors [21], viral transmission  
68 [22,23], differential expression of genes [24], and the interactions between those factors [1].  
69 Considering the reliance of various disease transmission models on relative humidity as a  
70 factor, as well as the numerous implications of relative humidity on mosquito physiology and  
71 behavior [17], more research must be aimed at addressing the direct effects of water loss (i.e.,  
72 dehydration) on mosquitoes. To continue addressing this lapse in research, our study  
73 incorporated transcriptomic analyses and physiological assays to address the biological effects  
74 of dehydration stress on *A. aegypti* bloodmeal processing. Specifically, this study developed  
75 transcriptomic profiles for the midguts of *A. aegypti* subjected to dehydration stress in relation to  
76 bloodfeeding, facilitating a better understanding of the compensatory mechanisms underlying  
77 physiological alterations. Understanding the interactions of a bloodmeal within the midgut of a  
78 dehydrated mosquito may offer insights into potential permissibility differences in the gut (e.g.,  
79 through altered regulatory mechanisms), with possible implications for disease transmission  
80 dynamics. Regardless, understanding the effect that a natural stressor like dehydration has on  
81 the midgut further necessitates the inclusion of environmental effects in disease dynamics. This  
82 study used next-generation sequencing to determine underlying genes involved in post-

83 dehydration bloodmeal regulation in *A. aegypti*. The results of this experiment revealed ion  
84 transporters, RNA regulation, and kinase involvement in dehydration and bloodfeeding  
85 exposures within the midgut. These findings, in addition those of stabilizing osmolality and  
86 unaltered midgut size or micronutrients, provide a more thorough understanding of the  
87 mechanisms that drive fluid acquisition and retention in dehydrated mosquitoes.

## 88 **Materials and Methods**

89 Mosquito husbandry: Mosquito larvae were reared according to standard practices on ground  
90 fish food (Tetramin) with added yeast extract (Fisher). Adult *A. aegypti* mosquitoes (Rockefeller  
91 strain) were reared under insectary conditions (27°C, 80% RH; saturation vapor pressure deficit  
92 (SVPD) = 0.71 kPa) in 12 x 12 x 12" cages (BioQuip) with a 16h:8h light:dark cycle and  
93 unlimited access to DI water- and 10% sucrose solution-soaked cotton wicks *ad libitum*, unless  
94 otherwise stated.

95

96 Relative humidity exposure protocol: Similar to Holmes et al, (2022), mosquitoes were subjected  
97 to desiccators containing controlled relative humidity conditions at 27°C with 75% RH  
98 (dehydrating condition; SVPD = 0.89 kPa) or 100% RH (non-dehydrating condition; SVPD =  
99 0.00 kPa) by being placed in groups of 50 into mesh-covered 50mL centrifuge tubes. These  
100 humidity-controlled mosquitoes were held under desiccator conditions without access to water  
101 or sucrose solution for 18 hours before being subjected to downstream procedures.

102

103 Mosquito midgut processing for transcriptomic analyses: After RH treatment, mosquitoes were  
104 released into 12 x 12 x 12" cages (BioQuip) and permitted to bloodfeed to repletion  
105 (approximately 20 minutes) on a live human host (27-year-old male, leg; IRB, University of  
106 Cincinnati) or not permitted to bloodfeed but with a human leg just outside the cage. These  
107 conditions resulted in four different groups: N1, non-bloodfed/non-dehydrated (control) group;  
108 Y1, bloodfed/non-dehydrated group; N7, non-bloodfed/dehydrated group; Y7,  
109 bloodfed/dehydrated group. Three hours ( $\pm 1$ h) pbf, mosquitoes were dissected and the midguts  
110 from approximately 15 different mosquitoes were pooled and placed into Trizol (Invitrogen) held  
111 on ice. Digestion of blood occurs around 4 hours pbf [25] and diuresis is well underway within

112 2h [26,27], so dissections 3h post-bloodmeal were chosen to encompass differentially  
113 expressed genes related to altered blood digestion/water retention. Pooled midguts were  
114 homogenized (Benchmark, BeadBlaster 24), in Trizol and stored at -70°C until all samples were  
115 collected. RNA was extracted with Trizol according to manufacturer's protocols and cleaned  
116 with a RNeasy Mini Kit (Qiagen). DNase (Ambion, Turbo-DNA-free) was used to remove  
117 genomic DNA, RNA concentration was determined with a Nanodrop 2000 (Fisher), cDNA  
118 libraries were generated (Illumina, TruSeq), and next-generation sequencing was conducted at  
119 the Cincinnati Children's Hospital Medical Center's DNA Sequencing and Genotyping Core.  
120 Samples can be found in the Sequence Read Archive (SRA) Database (BioProject ID:  
121 PRJNA851095).

122

123 Gene expression analyses: Samples were analyzed through three separate pipelines using  
124 recommended settings throughout: CLC Genomics Workbench 12.1 (CLC Bio, Boston, MA,  
125 USA), DESeq2-Kallisto, and DESeq2-Sailfish. All pipelines used the published *A. aegypti*  
126 RefSeq assembly (accession: GCF\_002204515.2) as reference [28]. The latter two pipelines  
127 included importing samples into Galaxy [29], checking for quality with FastQC [30], trimming  
128 with Trimmomatic [31], and analyzing with Kallisto [32] or Sailfish [33], before utilization of  
129 DESeq2 [34]. Significantly expressed genes were determined by Bonferroni correction (p-value  
130 < 0.01), the genes identified by any pipeline are provided in (Supplementary Table 1), and the  
131 DESeq2 pipeline comparisons between transcript mean expression and fold-changes are  
132 included in (Supplementary Table 2). Transcriptomic methods revealed sufficient coverage, with  
133 approximately 75-105 million paired-end reads per sample (Table 1). Gene ontology (GO) terms  
134 were generated by importing all significantly expressed genes (p-value < 0.01) with a  $\geq$  2-fold  
135 fold-change identified by any pipeline (Supplementary Table 3) into g:Profiler [35]. Gene  
136 ontology terms were subsequently summarized with REVIGO [36] and visualized via CirGO [37]

137 (Supplementary Table 4). Although all pipelines were used to identify genes for the GO  
138 analyses, only DESeq2 pipeline results were compared for downstream expressional analyses.  
139 The CLC pipeline protocol included calculated mean expression values of zero for numerous  
140 genes, resulting in comparative fold-changes of infinity. However, in the DESeq2 pipelines,  
141 genes with expression values of zero were not included as part of the analysis, reducing the  
142 false positive identification rate of differentially expressed genes. Due to our smaller sample  
143 sizes and these differences in pipeline methodology, only the more conservative DESeq2  
144 pipelines were utilized for further analysis. All  $\log_2$  normalized mean expression values,  
145 regardless of group comparison, were compared between the DESeq2-Kallisto and DESeq2-  
146 Sailfish pipelines and were found to be considerably correlated ( $n = 181$ ,  $r = 0.921$ ,  $p\text{-value} <$   
147  $0.00001$ ; Supplementary Figure 1).

148

| <b>Group</b> | <b>Dehydration</b> | <b>Bloodfed</b> | <b>Sample</b> | <b>Paired-End Reads</b> |
|--------------|--------------------|-----------------|---------------|-------------------------|
| <b>N1</b>    | No                 | No              | N1-2          | 75,496,800              |
|              |                    |                 | N1-3          | 88,761,156              |
| <b>Y1</b>    | No                 | Yes             | Y1-1          | 89,322,470              |
|              |                    |                 | Y1-2          | 81,691,584              |
|              |                    |                 | Y1-3          | 74,120,060              |
| <b>N7</b>    | Yes                | No              | N7-1          | 105,818,594             |
|              |                    |                 | N7-2          | 105,385,942             |
|              |                    |                 | N7-3          | 82,647,520              |
| <b>Y7</b>    | Yes                | Yes             | Y7-1          | 95,531,032              |
|              |                    |                 | Y7-2          | 85,314,086              |

149 **Table 1:** Descriptive information regarding sample composition and read counts of experimental  
150 groups. Sample numbers are provided in the respective column.

151



152 Osmolality procedures: In addition to the two RH treatments, an additional post-dehydration  
153 exposure group was also analyzed 1h after taking a bloodmeal. Bloodfeeding was completed by  
154 filling artificial (Hemotek) reservoirs with chicken blood (Pel-Freez Biologicals), covering with  
155 parafilm (Sigma-Aldrich), warming to 37°C, introducing the covered reservoir to 12 x 12 x 12”  
156 cages (BioQuip) without access to water or sucrose solution for 1h, and allowing the dehydrated  
157 mosquitoes to feed to repletion [38]. Before use, chicken blood was held at -20°C and then  
158 permitted to thaw at 4°C. One hour after conclusion of RH treatment or post-RH treatment blood  
159 feeding, mosquito hemolymph was extracted for osmolality measurement with a vapor pressure  
160 osmometer (Wescor Vapro 5600, EliTech).

161  
162 Midgut volume quantification: Mosquitoes were bloodfed as before with an artificial feeder  
163 (Hemotek) filled with chicken blood (Pel-Freez Biologicals). Within 1h pbf, mosquitoes were  
164 knocked out with CO<sub>2</sub>, dissected (N = 86) in phosphate-buffered saline (PBS), and  
165 photographed (Dino-Lite). Micrometer measurements were calibrated and determined in GIMP  
166 [39], before volume was approximated as an ellipsoid ( $\frac{4}{3} * \pi * W^2 * L$ ).

167  
168 Nutritional assays: Briefly, nutritional assays for lipid, glycogen, and trehalose levels were  
169 adapted from previous studies [40–42] and combined to allow for technical and biological  
170 replication. After relative humidity treatments, additional cohorts were permitted access to water  
171 and 10% sucrose solutions *ad libitum* for 24 hours to represent recovery conditions from these  
172 treatments. The colony group in this context represents *A. aegypti* that were subjected to only  
173 colony conditions and not any additional RH treatment. For quantification, mosquitoes were  
174 collected from the same group, placed in a freezer until death (-20°C), added in groups of 4 to  
175 STE buffer (2% Na<sub>2</sub>SO<sub>4</sub>), homogenized (Benchmark, BeadBlaster 24), and aliquoted for lipid

176 (100 $\mu$ L), trehalose (150 $\mu$ L), and glycogen (150 $\mu$ L). Six groups in biological triplicates and two  
177 standard curves in technical duplicate were distributed across two 96-well plates (Zinsser).  
178 Absorbance was determined on a microplate reader (Biotek, Synergy H1) at 525 and 625nm for  
179 lipids and carbohydrates respectively. Due to the nested nature of the biological sample  
180 replicates, each group was replicated at least thrice on the two-plate design.

181

182 Statistical analyses: Data management was completed in Excel [43] and R [44] through plyr  
183 [45], tidyr [46], dplyr [47], and Rmisc [48] packages. Figures were made in R using ggplot2 [49],  
184 in Excel [43], and with CirGO, before finalization in GIMP [39] and Inkscape [50]. Tables were  
185 made in Excel [43]. R (version 4.0.2) was used to complete appropriate statistical analyses [44].

186 **Results**

187 **Gene ontology reveals slight differences between midgut groups.**

188 Our groups consisted of non-bloodfed (N), and bloodfed (Y) mosquitoes held at either 75% RH  
189 (7) or 100% RH (1). Our analyses identified hundreds of genes with differentially expressed  
190 transcripts between midgut group comparisons, revealing relatively constrained functionality  
191 within the midgut regardless of dehydration or bloodfeeding (Table 2). Despite the three-fold  
192 number of genes identified between the dehydrated and non-dehydrated midguts of non-  
193 bloodfed *A. aegypti* (237 genes), the comparison between dehydrated and non-dehydrated  
194 bloodfed midguts had the lowest number of differentially expressed genes, with less than 80  
195 total genes identified (Table 2). These comparisons underscore the similarities in dehydrated  
196 and non-dehydrated midgut functionality within three hours pbf (Table 2).

| <b>Group</b> | <b>Comparison</b> | <b>Genes</b> | <b>GO Pathways</b> | <b>REVIGO Terms</b> |
|--------------|-------------------|--------------|--------------------|---------------------|
| <b>Y1N1</b>  | <b>Y1/N1</b>      | 145          | 7                  | 4                   |
|              | <b>N1/Y1</b>      | 62           | 3                  | 3                   |
| <b>N7N1</b>  | <b>N7/N1</b>      | 146          | 4                  | 2                   |
|              | <b>N1/N7</b>      | 91           | 13                 | 5                   |
| <b>Y7Y1</b>  | <b>Y7/Y1</b>      | 37           | 0                  | 0                   |
|              | <b>Y1/Y7</b>      | 40           | 0                  | 0                   |
| <b>N7Y7</b>  | <b>N7/Y7</b>      | 390          | 8                  | 5                   |
|              | <b>Y7/N7</b>      | 281          | 29                 | 4                   |

197 **Table 2:** Group comparison information regarding significantly expressed genes, Gene  
198 Ontology (GO) pathways, and REVIGO terms. Gene lists, GO pathways, and REVIGO terms  
199 were generated from transcripts identified by any pipeline. Specific information can be found in  
200 Supplementary Tables 1-4. Group N1Y1 represents comparisons between the non-  
201 bloodfed/non-dehydrated and the bloodfed/non-dehydrated groups; N7N1, non-  
202 bloodfed/dehydrated and non-bloodfed/non-dehydrated groups; Y7Y1, bloodfed/dehydrated and  
203 bloodfed/non-dehydrated groups; N7Y7, non-bloodfed/dehydrated and bloodfed/dehydrated  
204 groups.

205

206 All comparisons showed GO differences except for the contrasts between Y7 and Y1  
207 groups, indicating that regardless of the level of dehydration status experienced in this study,  
208 bloodmeal processing in the midgut was remarkably similar (Figure 1; Supplementary Figure 1).  
209 The primary non-bloodfed N7\_N1 comparison revealed cell and membrane interactions (Figure  
210 1A), while the N1\_N7 comparison showed persistent changes to ion channel activity (Figure  
211 1B). The N1\_Y1 comparison showed differences in developmental and regulatory genes  
212 (Supplementary Figure 2A), Y1\_N1 revealed GO terms consistent with bloodmeal breakdown  
213 (Supplementary Figure 2B), N7\_Y7 showed changes in protein binding and transcription  
214 (Supplementary Figure 2C), and Y7\_N7 also uncovered GO terms associated with bloodfeeding  
215 as well as a number of terms relating to snRNPs and RNA functionality (Supplementary Figure  
216 2D).

217

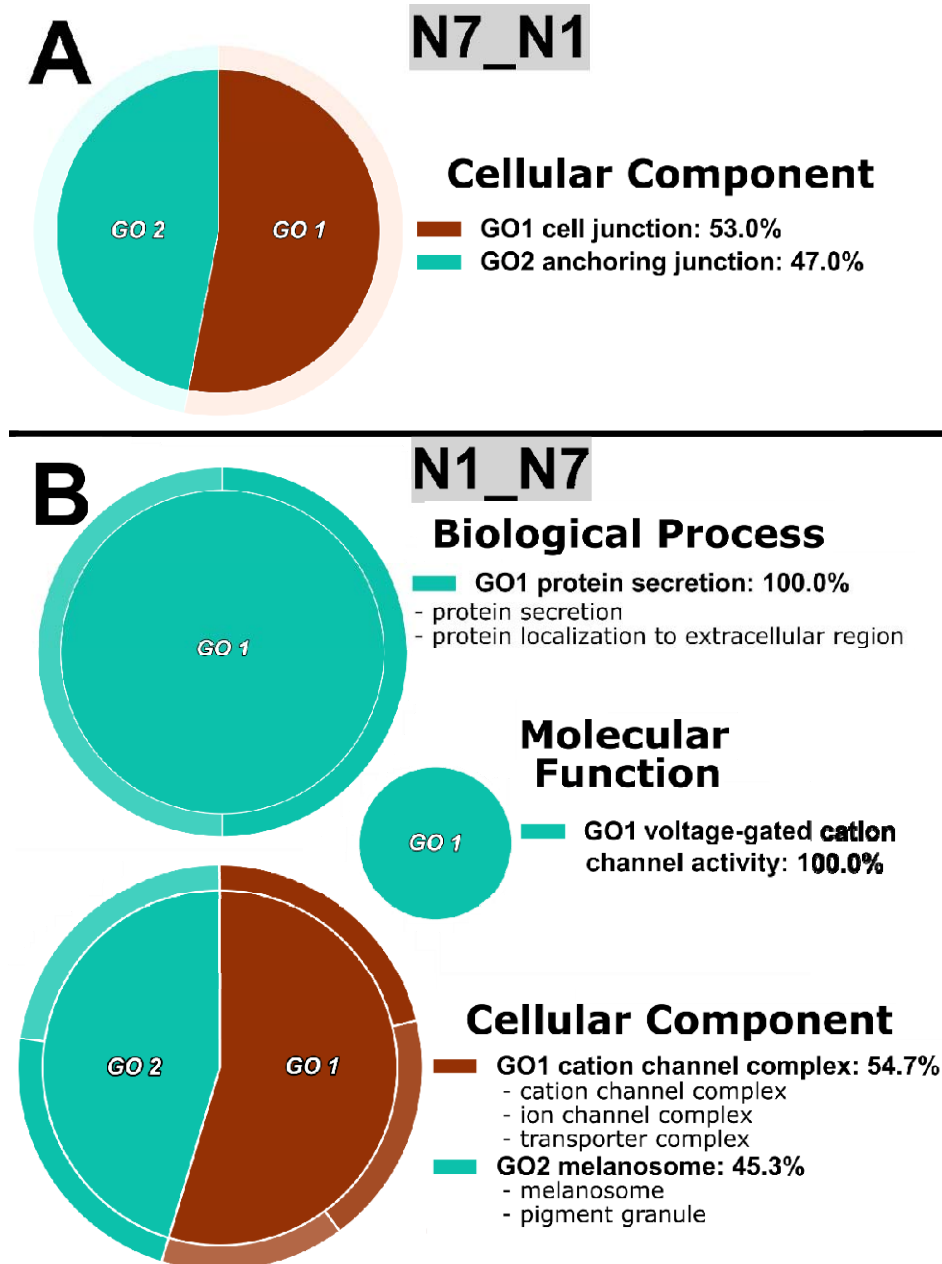

218

219 **Figure 1:** Functional enrichment analyses for non-bloodfed *A. aegypti* midguts. A, circular gene  
220 ontology (CirGO) representations of reduced and visualized gene ontology (REVIGO) terms in  
221 the non-bloodfed/dehydrated group over the non-bloodfed/non-dehydrated group (N7\_N1); B,  
222 CirGO-REVIGO representations for the non-bloodfed/non-dehydrated group over the non-  
223 bloodfed/dehydrated group over (N1\_N7). REVIGO groupings are included in Supplementary  
224 Table 3 and significant g:Profiler terms are included in Supplementary Table 4 with  
225 “intersections” indicating the genes responsible for GO categorization. CLC labels represent  
226 significant transcripts identified with the QIAGEN CLC pipeline; DS, the DESeq2-kallisto  
227 pipeline; and DK, the DESeq2-Sailfish pipeline.

228

229           In both the dehydrated and non-dehydrated comparisons between bloodfed and non-  
230 bloodfed *A. aegypti*, numerous transcripts directly associated with bloodmeal processing (e.g.,  
231 trypsin, peritrophin, etc.) were upregulated in the bloodfed group, while a limited and lowly  
232 expressed set were significantly differentiated in the non-bloodfed group (Supplementary Figure  
233 3). When comparing non-bloodfed groups, dehydrated *A. aegypti* had considerably more, and  
234 more highly expressed, transcripts than the non-dehydrated group (Figure 2A). In our  
235 dehydrated comparison (Supplementary Figure 3B), the non-bloodfed group also showed  
236 considerably more transcripts than the non-bloodfed, non-dehydrated group in a similar  
237 comparison (Supplementary Figure 3A; Table 2). The dehydrated group also expressed  
238 significant transcripts related to transporters and apoptosis while the non-dehydrated control  
239 had lowly-expressed phosphatases with high fold-changes (Figure 2A). When comparing  
240 bloodfed groups, there were only a couple dozen differentially expressed genes between the  
241 non-dehydrated and dehydrated groups, while all the transcripts had low mean expression  
242 values (Figure 2B). Furthermore, the non-dehydrated bloodfed group consisted of transcripts  
243 encoding cytoskeletal/structural elements (e.g., raphilin-2, Lasp, etc.) and the dehydrated  
244 bloodfed group featured differential regulation of ion transporters and kinases (Figure 2B). The  
245 dehydrated comparison between non-bloodfed and bloodfed *A. aegypti* showed stark similarities  
246 to the non-dehydrated bloodfeeding comparison in regard to bloodmeal processing  
247 (Supplementary Figure 3).

248

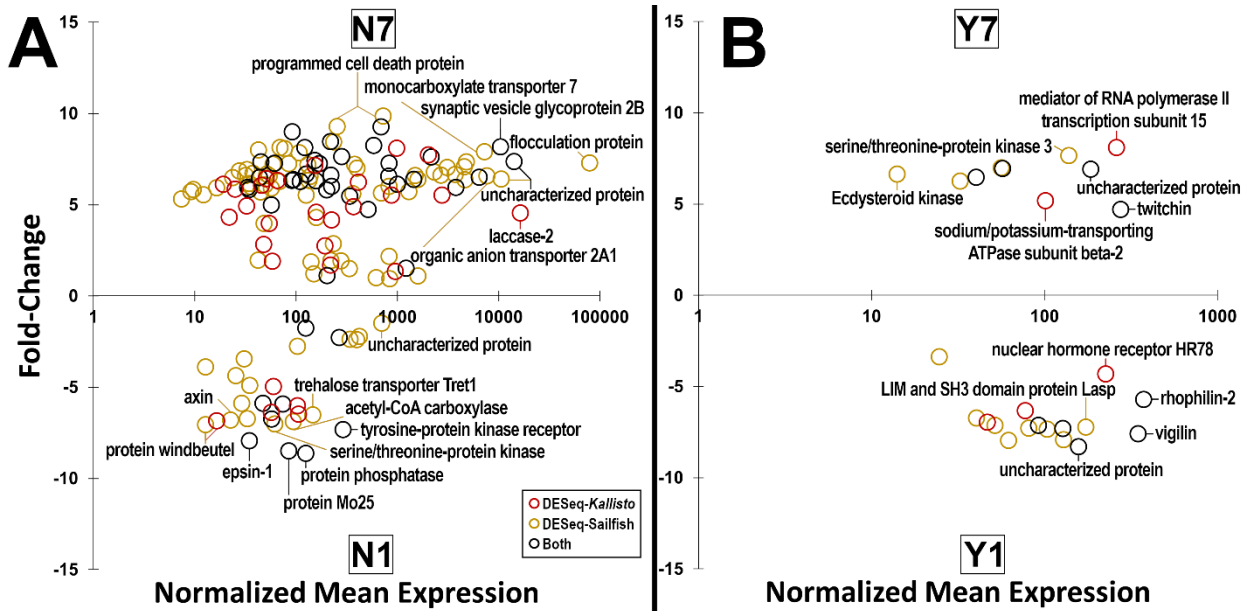

249

250 **Figure 2:** Fold-change and normalized mean expression comparisons for all significantly  
 251 expressed genes identified by DESeq2 pipelines. A, comparison between the non-  
 252 bloodfed/dehydrated group over the non-bloodfed/non-dehydrated group (N7 N1); B,  
 253 comparison between the bloodfed/non-dehydrated group over the bloodfed/dehydrated  
 254 (Y1 Y7). Yellow circles denote genes that were identified through the DESeq-Sailfish pipeline;  
 255 red circles, DESeq-Kallisto pipeline; and black circles were genes identified by both pipelines,  
 256 with the highest mean expression pipeline used. Significantly expressed transcripts are included  
 257 in Supplementary Table 1.

258

259 **Post-dehydration bloodfeeding shifts hemolymph osmolality back to control levels.**

260 Osmolality in the hemolymph increased as mosquitoes lost water, but within 1h pbf, hemolymph  
 261 osmolality returned to control levels in dehydrated-then-bloodfed mosquitoes (Figure 3A). No  
 262 alterations to lipid, glycogen, or the primary hemolymph carbohydrate, trehalose, were identified  
 263 (Supplementary Figure 4). Finally, no distinguishable volume changes were identified in the  
 264 dissected midguts of non-dehydrated/control-then-bloodfed, dehydrated-then-bloodfed, nor  
 265 colony-then-bloodfed mosquitoes (Figure 3B).

266

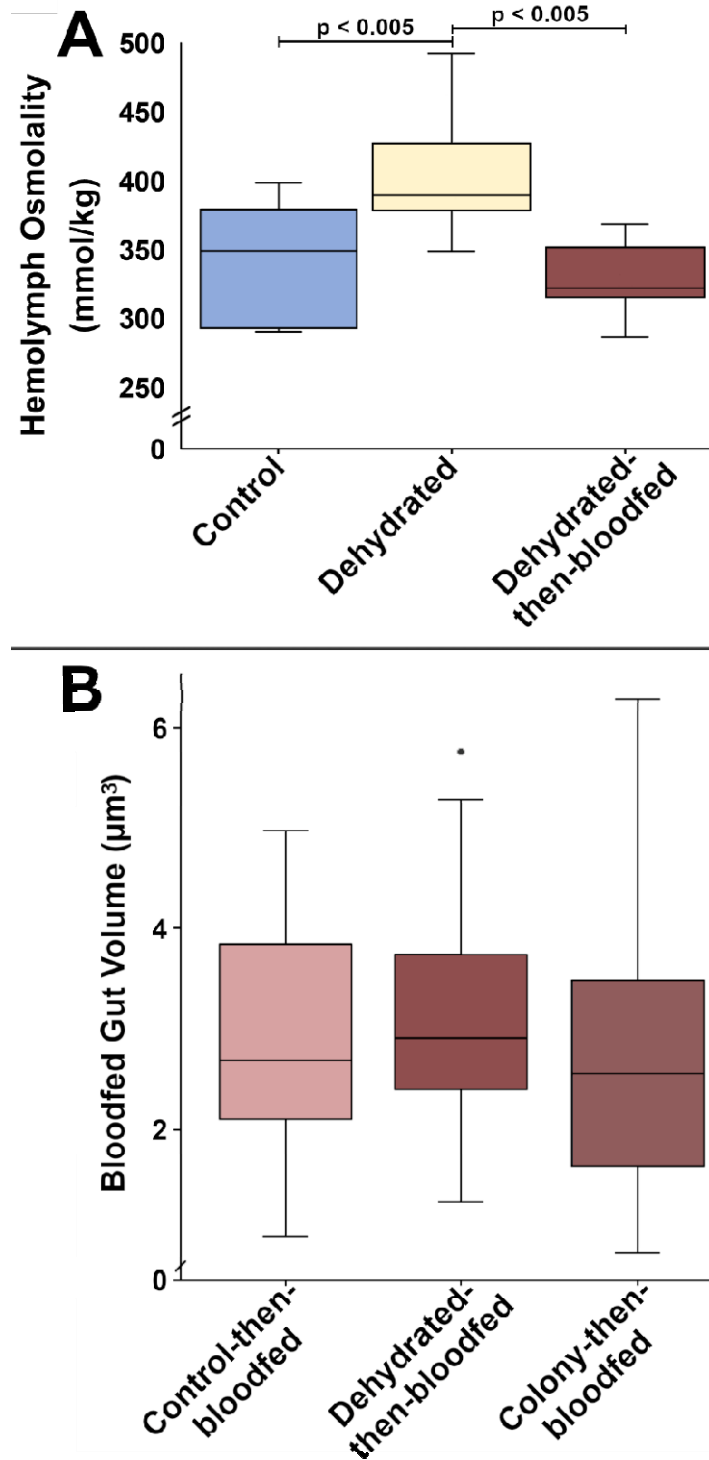

267

268 **Figure 3:** Hemolymph osmolality and bloodfed midgut volume for *A. aegypti* subjected to  
269 various treatments. A, hemolymph osmolality for control, dehydrated, and post-dehydration  
270 bloodfed *A. aegypti* (N = 30); B, midgut size comparisons for bloodfed *A. aegypti* after 18h of  
271 exposure to control, dehydrating, or colony conditions (N = 86). Significance was determined via  
272 ANOVA and Tukey's HSD test.



273 **Discussion**

274 Through bloodfeeding, mosquitoes have been afforded flexibility to the regulation of nutrients,  
275 reproductive output, survival, and more when compared to non-bloodfeeding organisms [51,52].  
276 For example, female mosquitoes with diminished nutritional reserves are capable of diverting  
277 nutrients from a bloodmeal to supplement existing levels, but do so at the expense of  
278 reproductive output [53]. Likewise, stress related to teneral nutritional reserves may result in  
279 differentially utilized nutrients [25]. It is therefore understandable that mosquitoes stressed with  
280 acute or persistent dehydration have adapted numerous mechanisms to combat this influence  
281 [17]. A recent study investigating the physiological effects of dehydration demonstrated that  
282 water loss plays an integral role in mosquito reproduction, survival, water content regulation,  
283 and vectorial capacity [7]. In this study, we expand on these findings by exploring the potential  
284 underlying mechanisms by which these physiological changes may occur, through investigation  
285 of transcriptomic, volumetric, and osmolality changes at the midgut interface.

286 A previous study on the whole-body transcriptome of non-bloodfed dehydrated *C.*  
287 *pipiens* showed that many significantly upregulated pathways were related to carbohydrate  
288 metabolism [1]. These carbohydrate metabolism pathway alterations clearly corroborate the  
289 findings in another study showing that repeated bouts of dehydration resulted in reduced levels  
290 of stored carbohydrates and lipids in *C. pipiens* [8]. When sugar and water were withheld and  
291 mosquitoes were permitted or prohibited to bloodfeed, proteins were consistently altered [7], but  
292 our research showed that other micronutrients including trehalose, glycogen, and lipids were not  
293 different between groups (Supplementary Figure 4). The lack of significant changes to nutrition  
294 were likely the result from the short interval in which the metabolic assays were completed  
295 (<18h after experimental onset), but nonetheless represent responses to water loss, not  
296 nutritional depletion. Benoit et al., (2010) dehydrated non-bloodfed *C. pipiens* to the point of  
297 25% water loss (comparable water loss to our study) then allowed them to recover before taking  
298 nutrient levels and likewise saw no differences in lipids, glycogen, protein, or sugar levels.

299 Although the midgut-specific focus of the sequencing in this research limited the breadth at  
300 which carbohydrate metabolism pathways could be discovered, the resolution at which the  
301 expressional analyses were performed allowed us to thoroughly investigate the effects of  
302 bloodfeeding and dehydration at the intersection of the midgut. Through analysis of the  
303 underlying mechanisms, we have facilitated a more thorough understanding on how mosquitoes  
304 respond to dehydration stress in the context of 1) water and nutrient utilization and 2) bloodmeal  
305 protein utilization. This mechanistic knowledge provides much needed context for recent  
306 discoveries involving the effects of dehydration stress on survival, reproduction, and vectorial  
307 capacity, within medically-important mosquitoes species [1,7].

308 To process a bloodmeal, which is composed of 80-87% water and approximately 90%  
309 protein composition in the remaining dry mass, mosquitoes must promptly and efficiently  
310 regulate these abundant resources [54,55]. Under normal conditions, approximately 40% of  
311 water, sodium (Na), and chloride (Cl) derived from a bloodmeal are reportedly excreted within  
312 the first two hours pbf [27]. However, as *A. aegypti* become dehydrated, pbf diuresis  
313 substantially decreases [7], likely resulting in increased urine retention by the Malpighian  
314 tubules. This information coupled with our osmolality findings taken one-hour pbf indicate that *A.*  
315 *aegypti* can exchange ions and extract water from a bloodmeal when necessary to combat  
316 dehydration. While ions are actively transferred through the midgut, as indicated by differential  
317 expression of ion transporters in this study, water transfer from the more dilute human blood into  
318 the hemolymph may occur passively due to osmolality differences [27,56]. The excessive  
319 quantities of water and protein in a bloodmeal afford flexibility to mosquitoes, allowing for  
320 excretion or rapid replacement of previously lost water. The increased retention of bloodmeal  
321 components, as seen in this study through reequilibrated hemolymph osmolality and  
322 transcriptional regulation of ion transporters, is also corroborated by previous studies reporting  
323 reduced diuresis as well as by high variability observed in the dry masses of dehydrated

324 mosquitoes [this study,1,7]. Specifically, our study shows that numerous genes consistent with  
325 ion channel activity were differentially regulated between our non-dehydrated and dehydrated  
326 groups and that bloodmeal processing (e.g., trypsin, peritrophin) genes were differentially  
327 regulated in our bloodfed groups. Our osmolality data paired with the expression of ion  
328 transporters during *A. aegypti* dehydration, further underscores the importance of water content  
329 regulation in mosquitoes.

330         As for protein utilization, a considerable amount of enzymatic/proteolytic activity occurs  
331 in the ectoperitrophic space, and very little activity in the blood-filled midgut homogenates  
332 [57,58]. A number of these processes are implicated in our transcriptional analyses (e.g.,  
333 peritrophin, trypsin, etc.). Additional transcripts such as ion transporters and kinases offer  
334 insight into the potential means through which *A. aegypti* may compensate for dehydration and  
335 bloodfeeding stress at the midgut interface. In our comparison between bloodfed groups, the  
336 dehydrated group had increased expression in a number of kinases over the non-dehydrated  
337 group. Of particular interest, one specific gene (AAEL012685-RC) encoded an ecdysteroid  
338 kinase (the family including ecdysteroid 22-kinase), which closely identifies with juvenile  
339 hormone-inducible proteins and hypothetical proteins found across an array of other medically-  
340 important mosquito species (e.g., *Anopheles gambiae*, *Culex pipiens*, *Aedes albopictus*, etc.;  
341 Supplementary Table 5). This may offer additional insight into the reasons behind reduced egg  
342 production observed in dehydrated mosquitoes [7], or potentially into the veiled 20-  
343 hydroxyecdysone (20E) signaling pathway. Another over-expressed gene of interest identified in  
344 our Y1\_Y7 comparison, vigilin (AAEL001421-RA), has been implicated in the formation of  
345 RACK1, which is involved in viral RNA binding for DENV genome amplification [59]. Considering  
346 the abundance of RNA-involved processes in our Y7\_N7 comparison, especially regarding our  
347 Y1\_N1 comparison, possibilities exist for interactions between imbibed pathogens and the  
348 genes expressed within dehydrated mosquitoes. However, more research is needed to address

349 the potential for altered processing of a post-dehydration bloodmeal in the event that an imbibed  
350 bloodmeal were to contain pathogens such as Mayaro, Zika, or Dengue (DENV) viruses.

351 Mosquitoes that underwent dehydration stress were predicted to increase WNV  
352 infections as a result of increased biting propensity, while in a similar finding, mosquitoes with  
353 reduced nutritional reserves had an increased propensity to orally transmit WNV infection [1,18].  
354 We originally postulated that mosquitoes may compensate for dehydration stress by over-  
355 indulging on a bloodmeal, resulting in increased permissibility for imbibed pathogens via  
356 induced microperforations [60], but our volumetric analyses determined that the midgut was not  
357 overfilled immediately after bloodfeeding. These findings, however, do not exclude the  
358 influences of gene regulation on pathogen interactions. It is possible that dehydration may  
359 prompt the supplementation of pbf water and nutritional reserves at the expense of reproduction  
360 [7,53], and that dehydration may also promote increased instances of refeeding in dehydrated  
361 mosquitoes, furthering the potential for additional pathogen exposure for both hosts and vectors.  
362 Similar to Armstrong et al. (2020), these dehydration-prompted refeedings may promote  
363 microperforations to the midgut, resulting in increased pathogen dissemination. Pathogen  
364 dissemination may also be encouraged in dehydrated mosquitoes by expedited passage of  
365 bloodmeal components through the midgut barrier via active means such as transporter-  
366 facilitated efflux and/or via passive means down a concentration gradient with water from  
367 relatively dilute blood to the more concentrated hemolymph. Furthermore, the previously  
368 reported reduction to pbf diuresis in dehydrated mosquitoes may continue to alter pathogen  
369 interactions within the mosquito via increased bloodmeal retention [7]. To address these  
370 possibilities, more research should be completed on the direct influence of dehydration as well  
371 as the effects of dehydration-induced refeeding on midgut permissibility to, and downstream  
372 retention of, pathogens. Hopefully, these results may be used to continue addressing the gaps  
373 in knowledge regarding the impact of dehydration on arthropod-borne disease transmission that

374 still exist. Additional information on the direct interaction between pathogens and dehydrated  
375 mosquitoes, especially at the midgut interface, is sorely needed.

376

### 377 **Conclusions**

378 Mosquitoes must meticulously regulate water content to maintain homeostasis, especially after  
379 imbibing a bloodmeal. These dynamics become particularly interesting in dehydrating  
380 conditions, with a recent study reporting that 70-90% of the largest bloodmeals taken by *A.*  
381 *aegypti* and *C. pipiens* (as indicated by hemoglobin content) were found in dehydrated  
382 mosquitoes [7]. However, in this study, we saw no indication of enlargement in dehydrated *A.*  
383 *aegypti* midguts, further indicating the expedited processing of post-dehydration bloodmeals.  
384 Taken together with the knowledge that *A. aegypti* are also known to reduce pbf diuresis when  
385 dehydrated [7], these results indicate an ability to begin bloodmeal processing for rehydration  
386 during or immediately after feeding. This may result in an overall greater intake and retention of  
387 a post-dehydration bloodmeal, all while lost water is replenished and maximum midgut size  
388 remains unsurpassed. Although *A. aegypti* did not undergo diuresis while feeding as *Anopheles*  
389 species do, alterations in GO pathways, underlying genes, bloodmeal processing, and retention  
390 in dehydrated *A. aegypti* indicate that similar processes may be involved. Considering the  
391 possibility of dehydrated mosquitoes to imbibe and expeditiously process pathogens alongside  
392 bloodmeal components, as well as the potential for more direct vector-pathogen interactions,  
393 more research on pathogen ingestion and dissemination in this context remains intriguing and  
394 necessary.

395 **Acknowledgements**

396 This research was supported by the National Institute of Allergy and Infectious Diseases of the  
397 National Institutes of Health, Award Number R01AI148551. The content reported here is the  
398 sole responsibility of the authors and not necessarily a representation of the views of the  
399 National Institutes of Health.

400 **CRedit authorship contribution statement**

401 **Christopher J. Holmes:** Conceptualization, Methodology, Software, Validation, Formal  
402 analysis, Investigation, Resources, Data curation, Writing – original draft, Writing – review &  
403 editing, Visualization, Supervision, Project administration.

404 **Elliott S. Brown:** Conceptualization, Methodology, Software, Validation, Formal analysis,  
405 Investigation, Data curation.

406 **Dhriti Sharma:** Conceptualization, Methodology, Investigation, Data curation.

407 **Matthew Warden:** Conceptualization, Methodology, Investigation, Data curation.

408 **Atit Pathak:** Methodology, Investigation, Data curation.

409 **Blaine Payton:** Investigation, Data curation.

410 **Quynh Nguyen:** Investigation, Data curation.

411 **Austin A. Spangler:** Methodology, Investigation, Data curation.

412 **Jaishna Sivakumar:** Investigation, Data curation.

413 **Jacob M. Hendershot:** Investigation.

414 **Joshua B. Benoit:** Conceptualization, Methodology, Validation, Resources, Writing – review &  
415 editing, Visualization, Supervision, Project administration, Funding acquisition.

416 **Declaration of competing interest**

417 The authors declare no conflicts of interest.

418 **References**

- 419 1. Hagan, R.W.; Didion, E.M.; Rosselot, A.E.; Holmes, C.J.; Siler, S.C.; Rosendale, A.J.;  
420 Hendershot, J.M.; Elliot, K.S.B.; Jennings, E.C.; Nine, G.A.; et al. Dehydration Prompts  
421 Increased Activity and Blood Feeding by Mosquitoes. *Sci. Rep.* **2018**, *8*, 1–12,  
422 doi:10.1038/s41598-018-24893-z.
- 423 2. Canyon, D. V; Hii, J.L.K.; Müller, R. Adaptation of *Aedes aegypti* (Diptera: Culicidae)  
424 Oviposition Behavior in Response to Humidity and Diet. *J. Insect Physiol.* **1999**, *45*, 959–  
425 964.
- 426 3. Costa, E.A.P.D.A.; Santos, E.M.D.M.; Correia, J.C.; Albuquerque, C.M.R. De Impact of  
427 Small Variations in Temperature and Humidity on the Reproductive Activity and Survival  
428 of *Aedes aegypti* (Diptera, Culicidae). *Rev. Bras. Entomol.* **2010**, *54*, 488–493,  
429 doi:10.1590/S0085-56262010000300021.
- 430 4. Khan, A.A.; Maibach, H.I. A Study of the Probing Response of *Aedes aegypti*. 4. Effect of  
431 Dry and Moist Heat on Probing. *J. Econ. Entomol.* **1971**, *64*, 442–443.
- 432 5. Rowley, W.A.; Graham, C.L. The Effect of Temperature and Relative Humidity on the  
433 Flight Performance of Female *Aedes aegypti*. *J. Insect Physiol.* **1968**, *14*, 1251–1257,  
434 doi:10.1016/0022-1910(68)90018-8.
- 435 6. Parker, A.H. The Effect of a Difference in Temperature and Humidity on Certain  
436 Reactions of Female *Aedes aegypti* (L.). *Bull. Entomol. Res.* **1952**, *43*, 221–229,  
437 doi:10.1017/S0007485300030698.
- 438 7. Holmes, C.J.; Brown, E.S.; Sharma, D.; Nguyen, Q.; Spangler, A.A.; Pathak, A.; Payton,  
439 B.; Warden, M.; Shah, A.J.; Shaw, S.; et al. Bloodmeal Regulation in Mosquitoes Curtails  
440 Dehydration-Induced Mortality, Altering Vectorial Capacity. *J. Insect Physiol.* **2022**, *137*,

- 441 104363, doi:10.1016/j.jinsphys.2022.104363.
- 442 8. Benoit, J.B.; Patrick, K.R.; Desai, K.; Hardesty, J.J.; Krause, T.B.; Denlinger, D.L.  
443 Repeated Bouts of Dehydration Deplete Nutrient Reserves and Reduce Egg Production  
444 in the Mosquito *Culex pipiens*. *J. Exp. Biol.* **2010**, *213*, 2763–2769,  
445 doi:10.1242/jeb.044883.
- 446 9. Reidenbach, K.R.; Cheng, C.; Liu, F.; Liu, C.; Besansky, N.J.; Syed, Z. Cuticular  
447 Differences Associated with Aridity Acclimation in African Malaria Vectors Carrying  
448 Alternative Arrangements of Inversion 2La. *Parasites and Vectors* **2014**, *7*, 1–13,  
449 doi:10.1186/1756-3305-7-176.
- 450 10. Canyon, D. V.; Muller, R.; Hii, J.L.K. *Aedes aegypti* Disregard Humidity-Related  
451 Conditions with Adequate Nutrition. *Trop. Biomed.* **2013**, *30*, 1–8.
- 452 11. Dow, R.P.; Gerrish, G.M. Day-to-Day Change in Relative Humidity and the Activity of  
453 *Culex nigripalpus* (Diptera: Culicidae). *Ann. Entomol. Soc. Am.* **1970**, *63*, 995–999,  
454 doi:10.1093/aesa/63.4.995.
- 455 12. Lyons, C.L.; Coetzee, M.; Terblanche, J.S.; Chown, S.L. Desiccation Tolerance as a  
456 Function of Age, Sex, Humidity and Temperature in Adults of the African Malaria Vectors  
457 *Anopheles arabiensis* and *Anopheles funestus*. *J. Exp. Biol.* **2014**, *217*, 3823–3833,  
458 doi:10.1242/jeb.104638.
- 459 13. Kumar, M. Effect of Temperature and Humidity on Life Cycle Duration of *Culex*  
460 *quinquefasciatus* Say (Diptera: Culicidae) at Muzaffarpur (Bihar), India. *Adv. Biores.*  
461 **2015**, *6*, 103–105, doi:10.15515/abr.0976-4585.6.6.103105.
- 462 14. Leeson, H.S. Longevity of *Anopheles maculipennis* Race *Atroparvus*, van Thiel, at



- 463            Controlled Temperature and Humidity after One Blood Meal. *Bull. Entomol. Res.* **1939**,  
464            30, 295–301.
- 465    15.    Mayne, B. Notes on the Influence of Temperature and Humidity on Oviposition and Early  
466            Life of *Anopheles*. *Public Health Rep.* **1926**, 41, 986–990.
- 467    16.    Ruiz, M.O.; Chaves, L.F.; Hamer, G.L.; Sun, T.; Brown, W.M.; Walker, E.D.; Haramis, L.;  
468            Goldberg, T.L.; Kitron, U.D. Local Impact of Temperature and Precipitation on West Nile  
469            Virus Infection in *Culex* Species Mosquitoes in Northeast Illinois, USA. *Parasites and*  
470            *Vectors* **2010**, 3, 1–16, doi:10.1186/1756-3305-3-19.
- 471    17.    Holmes, C.J.; Benoit, J.B. Biological Adaptations Associated with Dehydration in  
472            Mosquitoes. *Insects* **2019**, 10, 375, doi:10.3390/insects10110375.
- 473    18.    Vaidyanathan, R.; Fleisher, A.E.; Minnick, S.L.; Simmons, K.A.; Scott, T.W. Nutritional  
474            Stress Affects Mosquito Survival and Vector Competence for West Nile Virus. *Vector-*  
475            *Borne Zoonotic Dis.* **2008**, 8, 727–732, doi:10.1089/vbz.2007.0189.
- 476    19.    Briegel, H.; Hörler, E. Multiple Blood Meals as a Reproductive Strategy in *Anopheles*  
477            (Diptera: Culicidae). *J. Med. Entomol.* **1993**, 30, 975–985, doi:10.1093/jmedent/30.6.975.
- 478    20.    Lea, A.O.; Briegel, H.; Lea, H.M. Arrest, Resorption, or Maturation of Oocytes in *Aedes*  
479            *aegypti*: Dependence on the Quantity of Blood and the Interval between Blood Meals.  
480            *Physiol. Entomol.* **1978**, 3, 309–316.
- 481    21.    Paz, S. Climate Change Impacts on West Nile Virus Transmission in a Global Context.  
482            *Philos. Trans. R. Soc. B Biol. Sci.* **2015**, 370, 1–11, doi:10.1098/rstb.2013.0561.
- 483    22.    Dodson, B.L.; Rasgon, J.L. Vector Competence of *Anopheles* and *Culex* Mosquitoes for  
484            Zika Virus. *PeerJ* **2017**, 5, e3096, doi:10.7717/peerj.3096.

- 485 23. Tingström, O.; Wesula Lwande, O.; Näslund, J.; Spyckerelle, I.; Engdahl, C.; Von  
486 Schoenberg, P.; Ahlm, C.; Evander, M.; Bucht, G. Detection of Sindbis and Inkoo Virus  
487 RNA in Genetically Typed Mosquito Larvae Sampled in Northern Sweden. *Vector-Borne*  
488 *Zoonotic Dis.* **2016**, *16*, 461–467, doi:10.1089/vbz.2016.1940.
- 489 24. Liu, K.; Dong, Y.; Huang, Y.; Rasgon, J.L.; Agre, P. Impact of Trehalose Transporter  
490 Knockdown on *Anopheles gambiae* Stress Adaptation and Susceptibility to *Plasmodium*  
491 *falciparum* Infection. *Proc. Natl. Acad. Sci.* **2013**, *110*, 17504–17509,  
492 doi:10.1073/pnas.1316709110.
- 493 25. Naksathit, A.T.; Edman, J.D.; Scott, T.W. Utilization of Human Blood and Sugar as  
494 Nutrients by Female *Aedes aegypti* (Diptera: Culicidae). *J. Med. Entomol* **1999**, *36*, 13–  
495 17.
- 496 26. Drake, L.L.; Boudko, D.Y.; Marinotti, O.; Carpenter, V.K.; Dawe, A.L.; Hansen, I.A. The  
497 Aquaporin Gene Family of the Yellow Fever Mosquito, *Aedes aegypti*. *PLoS One* **2010**, *5*,  
498 1–9, doi:10.1371/journal.pone.0015578.
- 499 27. Williams, J.C.; Hagedorn, H.H.; Beyenbach, K.W. Dynamic Changes in Flow Rate and  
500 Composition of Urine during the Post-Bloodmeal Diuresis in *Aedes aegypti* (L.). *J. Comp.*  
501 *Physiol. B* **1983**, *153*, 257–265, doi:10.1007/BF00689629.
- 502 28. Matthews, B.J.; Dudchenko, O.; Kingan, S.B.; Koren, S.; Antoshechkin, I.; Crawford, J.E.;  
503 Glassford, W.J.; Herre, M.; Redmond, S.N.; Rose, N.H.; et al. Improved Reference  
504 Genome of *Aedes aegypti* Informs Arbovirus Vector Control. *Nature* **2018**, *563*, 501–507,  
505 doi:10.1038/s41586-018-0692-z.
- 506 29. Afgan, E.; Baker, D.; Batut, B.; Van Den Beek, M.; Bouvier, D.; Ech, M.; Chilton, J.;  
507 Clements, D.; Coraor, N.; Grüning, B.A.; et al. The Galaxy Platform for Accessible,

- 508           Reproducible and Collaborative Biomedical Analyses: 2018 Update. *Nucleic Acids Res.*  
509           **2018**, *46*, W537–W544, doi:10.1093/nar/gky379.
- 510   30.   Andrews, S. FastQC: A Quality Control Tool for High Throughput 2015.
- 511   31.   Bolger, A.M.; Lohse, M.; Usadel, B. Trimmomatic: A Flexible Trimmer for Illumina  
512           Sequence Data. *Bioinformatics* **2014**, *30*, 2114–2120, doi:10.1093/bioinformatics/btu170.
- 513   32.   Bray, N.L.; Pimentel, H.; Melsted, P.; Pachter, L. Near-Optimal Probabilistic RNA-Seq  
514           Quantification. *Nat. Biotechnol.* **2016**, *34*, 525–527, doi:10.1038/nbt.3519.
- 515   33.   Patro, R.; Mount, S.M.; Kingsford, C. Seq Reads Using Lightweight Algorithms. *Nat.*  
516           *Biotechnol.* **2014**, *32*, 462–464, doi:10.1038/nbt.2862.Sailfish.
- 517   34.   Love, M.I.; Huber, W.; Anders, S. Moderated Estimation of Fold Change and Dispersion  
518           for RNA-Seq Data with DESeq2. *Genome Biol.* **2014**, *15*, 1–21, doi:10.1186/s13059-014-  
519           0550-8.
- 520   35.   Reimand, J.; Kull, M.; Peterson, H.; Hansen, J.; Vilo, J. G:Profiler-a Web-Based Toolset  
521           for Functional Profiling of Gene Lists from Large-Scale Experiments. *Nucleic Acids Res.*  
522           **2007**, *35*, 193–200, doi:10.1093/nar/gkm226.
- 523   36.   Supek, F.; Bošnjak, M.; Škunca, N.; Šmuc, T. Revigo Summarizes and Visualizes Long  
524           Lists of Gene Ontology Terms. *PLoS One* **2011**, *6*, doi:10.1371/journal.pone.0021800.
- 525   37.   Kuznetsova, I.; Lugmayr, A.; Siira, S.J.; Rackham, O.; Filipovska, A. CirGO: An  
526           Alternative Circular Way of Visualising Gene Ontology Terms. *BMC Bioinformatics* **2019**,  
527           *20*, 1–7, doi:10.1186/s12859-019-2671-2.
- 528   38.   Detinova, T.S.; Beklemishev, W.N.; Bertram, D.S. Age-Grouping Methods in Diptera of

- 529 Medical Importance With Special Reference to Some Vectors of Malaria. *World Heal.*  
530 *Organ. Monogr. Ser.* **1962**, *47*, 1–213.
- 531 39. The GIMP Development Team GIMP.
- 532 40. Rivers, D.B.; Denlinger, D.L. Redirection of Metabolism in the Flesh Fly, *Sarcophaga*  
533 *bullata*, Following Envenomation by the Ectoparasitoid *Nasonia vitripennis* and  
534 Correlation of Metabolic Effects with the Diapause Status of the Host. *J. Insect Physiol.*  
535 **1994**, *40*, 207–215, doi:10.1016/0022-1910(94)90044-2.
- 536 41. Van Handel, E. Rapid Determination of Glycogen and Sugars in Mosquitoes. *J. Am.*  
537 *Mosq. Control Assoc.* **1985**, *1*, 299–301.
- 538 42. Van Handel, E. Rapid Determination of Total Lipids in Mosquitoes. *J. Am. Mosq. Control*  
539 *Assoc.* **1985**, *1*, 302–304.
- 540 43. Microsoft Corporation Microsoft Excel.
- 541 44. R Core Team R: A Language and Environment for Statistical Computing 2021.
- 542 45. Wickham, H. The Split-Apply-Combine Strategy for Data Analysis. *J. Stat. Softw.* **2011**,  
543 *40*, 1–29.
- 544 46. Wickham, H. Tidy: Tidy Messy Data 2020.
- 545 47. Wickham, H.; Francois, R.; Henry, L.; Müller, K. Dplyr: A Grammar of Data Manipulation  
546 2017.
- 547 48. Hope, R.M. Rmisc: Rmisc: Ryan Miscellaneous 2013.
- 548 49. Wickham, H. *Ggplot2: Elegant Graphics for Data Analysis*; Springer-Verlag New York,

- 549 2009; ISBN 978-0-387-98140-6.
- 550 50. Inkscape Project Inkscape 2020.
- 551 51. Nayar, J.K.; Sauerman, D.M. The Effects of Nutrition on Survival and Fecundity on  
552 Florida Mosquitoes. *J. Med. Ent* **1975**, *12*, 99–103.
- 553 52. Holt, R.A.; Subramanian, G.M.; Halpern, A.; Sutton, G.G.; Charlab, R.; Nusskern, D.R.;  
554 Wincker, P.; Clark, A.G.; Ribeiro, M.C.; Wides, R.; et al. The Genome Sequence of the  
555 Malaria Mosquito *Anopheles gambiae*. *October* **2002**, *298*.
- 556 53. Foster, W.A. Mosquito Sugar Feeding and Reproductive Energetics. *Annu. Rev. Entomol.*  
557 **1995**, doi:10.1146/annurev.ento.40.1.443.
- 558 54. Lehane, M.J. *The Biology of Blood-Sucking in Insects, Second Edition*; Cambridge  
559 University Press: New York, 2005; ISBN 9780511610493.
- 560 55. Sanders, H.R.; Foy, B.D.; Evans, A.M.; Ross, L.S.; Beaty, B.J.; Olson, K.E.; Gill, S.S.  
561 Sindbis Virus Induces Transport Processes and Alters Expression of Innate Immunity  
562 Pathway Genes in the Midgut of the Disease Vector, *Aedes aegypti*. *Insect Biochem. Mol.*  
563 *Biol.* **2005**, *35*, 1293–1307, doi:10.1016/j.ibmb.2005.07.006.
- 564 56. Piermarini, P.M. *Renal Excretory Processes in Mosquitoes*; 1st ed.; Elsevier Ltd., 2016;  
565 Vol. 51; ISBN 9780128024577.
- 566 57. Van Handel, E.; Romoser, W.S. Proteolytic Activity in the Ectoperitrophic Fluid of  
567 Blood-fed *Culex nigripalpus*. *Med. Vet. Entomol.* **1987**, *1*, 251–255, doi:10.1111/j.1365-  
568 2915.1987.tb00351.x.
- 569 58. Clements, A.N. *The Biology of Mosquitoes: Development, Nutrition and Reproduction*;

- 570 Chapman & Hall: London, 1992; Vol. 1;.
- 571 59. Brugier, A.; Hafirassou, M.L.; Pourcelot, M.; Baldaccini, M.; Kril, V.; Couture, L.;  
572 Kümmerer, B.M.; Gallois-Montbrun, S.; Bonnet-Madin, L.; Vidalain, P.-O.; et al. RACK1  
573 Associates with RNA-Binding Proteins Vigilin and SERBP1 to Facilitate Dengue Virus  
574 Replication. *J. Virol.* **2022**, *96*, doi:10.1128/jvi.01962-21.
- 575 60. Armstrong, P.M.; Ehrlich, H.Y.; Magalhaes, T.; Miller, M.R.; Conway, P.J.; Bransfield, A.;  
576 Misencik, M.J.; Gloria-Soria, A.; Warren, J.L.; Andreadis, T.G.; et al. Successive Blood  
577 Meals Enhance Virus Dissemination within Mosquitoes and Increase Transmission  
578 Potential. *Nat. Microbiol.* **2020**, *5*, 239–247, doi:10.1038/s41564-019-0619-y.
- 579
